# Supplementary material
Source: publisher site journal article supplement (http://kjim.org/upload/media/kjim-2020-559-suppl4.pdf)
Supplement: Supplementary file 1 [file kjim-2020-559-suppl4.pdf]

**Supplementary Table 4. Treatment duration and dose of pirfenidone according to the change of FVC**

| Variable                                    | $\Delta$ FVC/year $\leq$ -10%<br>(n = 52) | -10% < $\Delta$ FVC/year $\leq$ -5%<br>(n = 20) | -5% < $\Delta$ FVC/year<br>(n = 102) | p value |
|---------------------------------------------|-------------------------------------------|-------------------------------------------------|--------------------------------------|---------|
| Duration of total pirfenidone treatment, mo | 17.1 $\pm$ 9.9                            | 17.3 $\pm$ 6.7                                  | 16.8 $\pm$ 9.9                       | 0.851   |
| Maximum dose of pirfenidone, mg             |                                           |                                                 |                                      | 0.947   |
| 1,800                                       | 23 (44.2)                                 | 10 (50.0)                                       | 45 (44.6)                            |         |
| 1,200–1,500                                 | 26 (50.0)                                 | 9 (45.0)                                        | 52 (51.5)                            |         |
| $\leq$ 600                                  | 3 (5.8)                                   | 1 (5.0)                                         | 4 (4.0)                              |         |
| Final dose of pirfenidone, mg               |                                           |                                                 |                                      | 0.854   |
| 1,800                                       | 8 (15.4)                                  | 5 (25.0)                                        | 21 (20.6)                            |         |
| 1,200–1,600                                 | 20 (38.5)                                 | 8 (40.0)                                        | 39 (38.2)                            |         |
| 800–1,000                                   | 1 (1.9)                                   | 0                                               | 5 (4.9)                              |         |
| $\leq$ 600                                  | 5 (9.6)                                   | 3 (15.0)                                        | 8 (7.8)                              |         |
| Discontinuation                             | 18 (34.6)                                 | 4 (20.0)                                        | 29 (28.4)                            |         |

Values are presented as mean  $\pm$  SD or number (%).

FVC, forced vital capacity.
